# Supplementary material
Source: PubMed Central journal article supplement (PMC7705960)
Supplement: np0c00648_si_001.pdf [file np0c00648_si_001.pdf]

## ASSOCIATED CONTENT

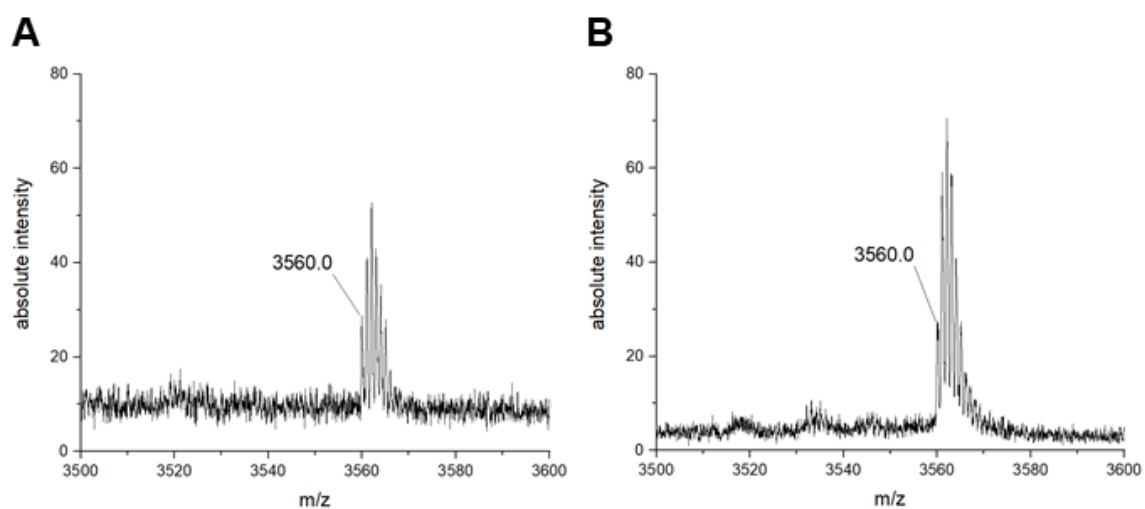

**Supplementary Figure S1. Comparative mass spectrometry of different beetroot extraction methods.** Mass spectrometry analysis crude extract prepared by chemical extraction of beetroot pulp (A) and beetroot juice (B).

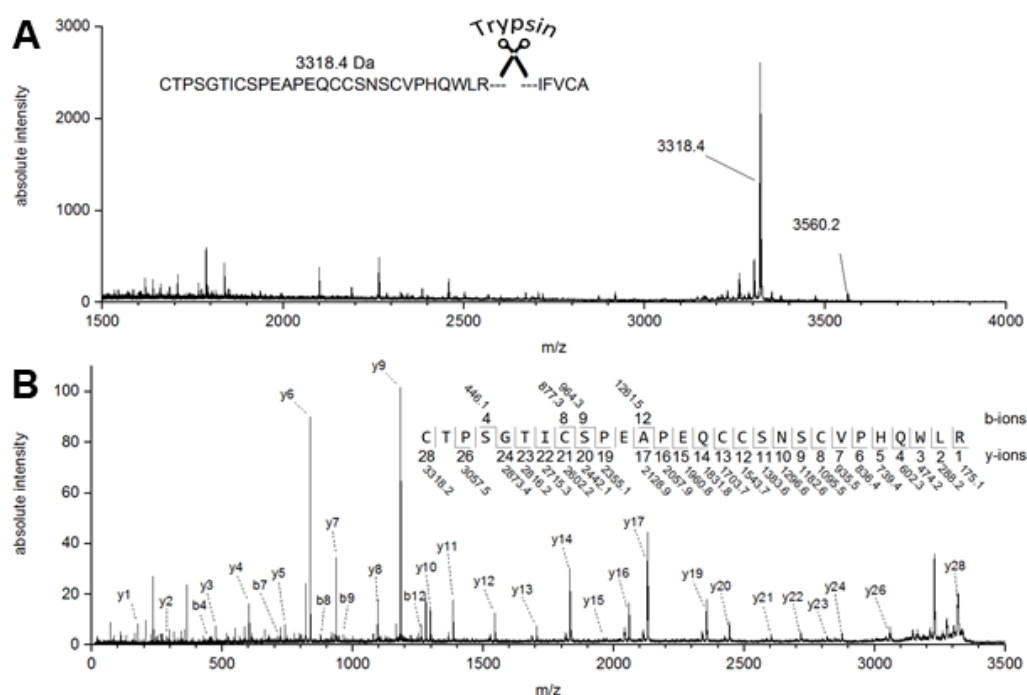

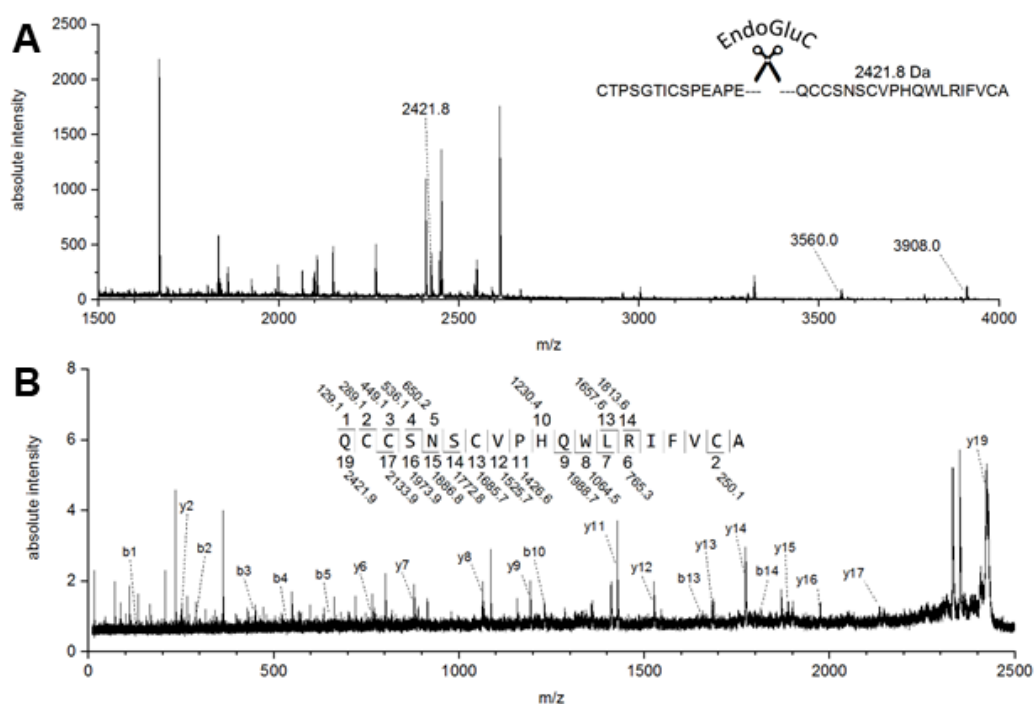

**Supplementary Figure S3. *De-novo* sequencing of bevuTI-I (endoproteinase GluC digestion).** (A) MALDI spectrum after digestion with endoproteinase GluC of carbamidomethylated bevuTI-I. One fragment (2421.8 Da) of bevuTI-I was used for *de-novo* sequencing. (B) Annotated MS/MS spectrum of the 2421.8 Da precursor.

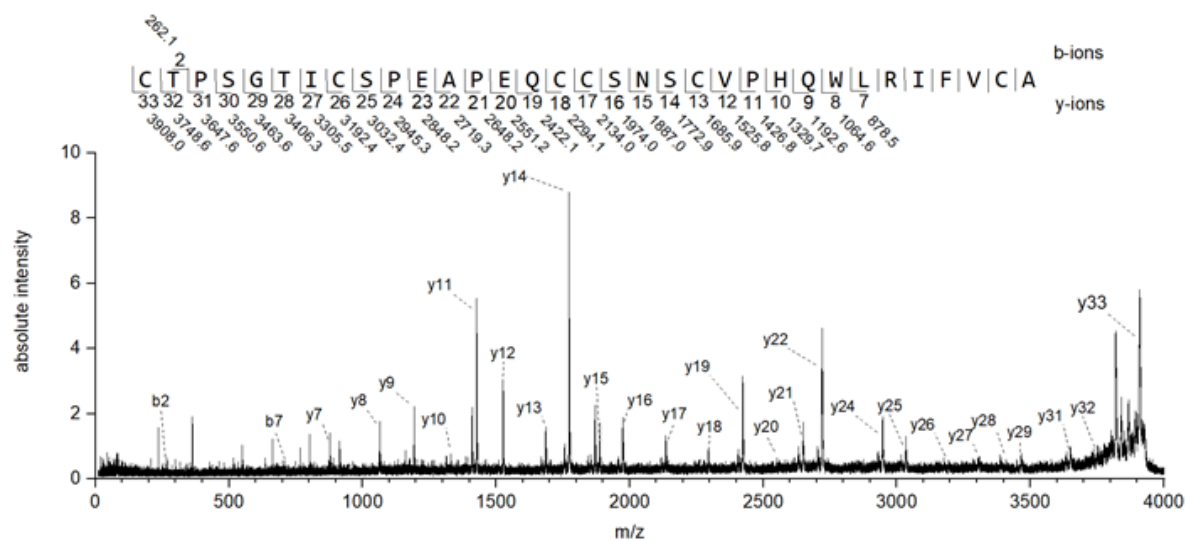

```

Beta_maritima  EECAPSGHICSGFGPPEQCCSGACVPHPMLRIFVC-
Beta_vulgaris  EECAPSGHICSGFGPPEQCCSGACVPHPMLRIFVC-
Beta_patula    EECAPSGHICSGFGPPEQCCSGACVPHPRLRIFVC-
BevuTI-I       --CTPSGTICSP EAP-EQCCSNSCVPHQWLRIFVCA
                *:***  ***  .*  *****.:*****  *****

```

**Supplementary Figure S5. Alignment of bevuTI-I with similar *Bevu* spp. sequences** (mature peptide domain). For precursor hits of *Beta maritima*, *Beta vulgaris* and *Beta patula* refer to Supplementary Data S3-S5. Cysteine residues are highlighted in yellow; ‘\*’, ‘.’ and ‘.’ indicate identical and similar amino acids, respectively.

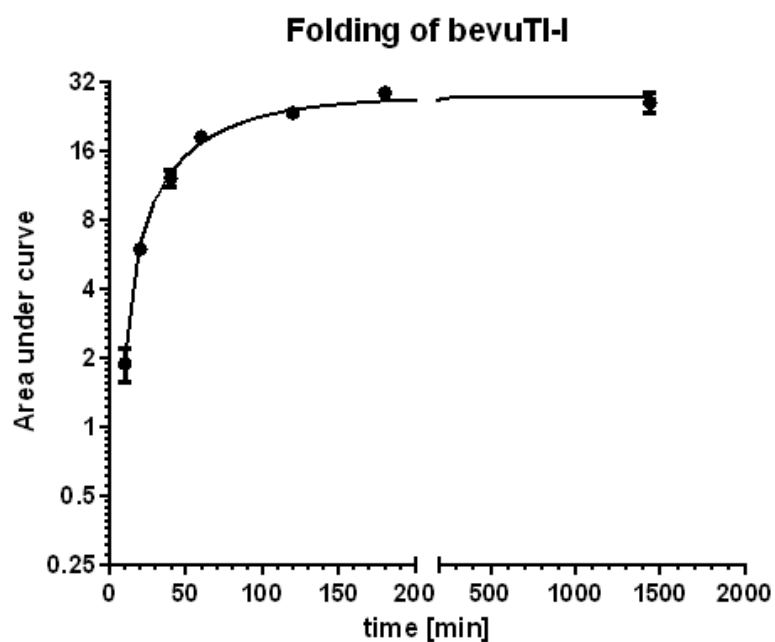

**Supplementary Figure S6. Oxidative folding kinetics of bevuTI-I.** The folding kinetics of bevuTI-I were determined based on the peak area of bevuTI-I in analytical HPLC chromatograms (wavelength: 214 nm) recorded at several time points (5, 10, 20, 40, 60 min and 1, 2, 3, 24 h) during oxidative folding.

**Supplementary Table S1.** Comparison of measured and calculated mass to charge ratios of y- and b-ions of the tryptic fragment with a mass of 3318.4 Da.

| Sequence | b-ions |                     |                        |            | y-ions |                     |             |            |
|----------|--------|---------------------|------------------------|------------|--------|---------------------|-------------|------------|
|          | b-ion  | measured mass in Da | theoretical mass in Da | difference | y-ion  | measured mass in Da | theoretical | difference |
| C        | b1     | n.d.                | 161.0                  |            | y28    | 3318.2              | 3318.4      | -0.1       |
| T        | b2     | 262.1               | 262.1                  | 0.0        | y27    | 3158.4              | 3158.4      | 0.0        |
| P        | b3     | n.d.                | 359.1                  |            | y26    | 3057.5              | 3057.3      | 0.0        |
| S        | b4     | 446.1               | 446.1                  | -0.1       | y25    | 2960.3              | 2960.3      | 0.0        |
| G        | b5     | 503.2               | 503.2                  | 0.0        | y24    | 2873.4              | 2873.2      | -0.1       |
| T        | b6     | n.d.                | 604.2                  |            | y23    | 2816.2              | 2816.2      | 0.0        |
| I        | b7     | 717.3               | 717.3                  | 0.0        | y22    | 2715.3              | 2715.2      | -0.1       |
| C        | b8     | 877.3               | 877.3                  | 0.0        | y21    | 2602.2              | 2602.1      | -0.1       |
| S        | b9     | 964.3               | 964.3                  | 0.0        | y20    | 2442.1              | 2442.1      | -0.1       |
| P        | b10    | 1061.4              | 1061.4                 | 0.0        | y19    | 2355.1              | 2355.1      | -0.1       |
| E        | b11    | n.d.                | 1190.4                 |            | y18    | 2257.9              | 2258.0      | -0.1       |
| A        | b12    | 1261.5              | 1261.5                 | 0.0        | y17    | 2128.9              | 2129.0      | -0.1       |
| P        | b13    | n.d.                | 1358.5                 |            | y16    | 2057.9              | 2057.9      | -0.1       |
| E        | b14    | n.d.                | 1487.6                 |            | y15    | 1960.8              | 1960.9      | -0.1       |
| Q        | b15    | n.d.                | 1615.6                 |            | y14    | 1831.8              | 1831.8      | -0.1       |
| C        | b16    | n.d.                | 1775.6                 |            | y13    | 1703.7              | 1703.8      | -0.2       |
| C        | b17    | n.d.                | 1935.6                 |            | y12    | 1543.7              | 1543.8      | -0.2       |
| S        | b18    | n.d.                | 2022.7                 |            | y11    | 1383.6              | 1383.8      | -0.2       |
| N        | b19    | n.d.                | 2136.7                 |            | y10    | 1296.6              | 1296.7      | -0.1       |
| S        | b20    | n.d.                | 2223.7                 |            | y9     | 1182.6              | 1182.7      | -0.2       |
| C        | b21    | n.d.                | 2383.7                 |            | y8     | 1095.5              | 1095.6      | -0.2       |
| V        | b22    | n.d.                | 2482.8                 |            | y7     | 935.5               | 935.6       | -0.2       |
| P        | b23    | n.d.                | 2579.9                 |            | y6     | 836.4               | 836.6       | -0.2       |
| H        | b24    | n.d.                | 2716.9                 |            | y5     | 739.4               | 739.5       | -0.1       |
| Q        | b25    | n.d.                | 2845.0                 |            | y4     | 602.3               | 602.5       | -0.2       |
| W        | b26    | n.d.                | 3031.1                 |            | y3     | 474.2               | 474.4       | -0.2       |
| L        | b27    | n.d.                | 3144.2                 |            | y2     | 288.2               | 288.3       | -0.1       |
| R        | b28    | n.d.                | 3319.4                 |            | y1     | 175.1               | 175.2       | -0.1       |

n.d. not detected

**Supplementary Table S2.** Comparison of measured and calculated mass to charge ratios of y- and b-ions of the fragment (2421.8 m/z) obtained by digestion with endoproteinase GluC.

| Sequence | b-ions |                     |                        |            | y-ions |                     |                        |            |
|----------|--------|---------------------|------------------------|------------|--------|---------------------|------------------------|------------|
|          | b-ion  | measured mass in Da | theoretical mass in Da | difference | y-ion  | measured mass in Da | theoretical mass in Da | difference |
| Q        | b1     | 129.1               | 129.1                  | 0.0        | y19    | 2421.9              | 2422.1                 | -0.2       |
| C        | b2     | 289.1               | 289.1                  | 0.0        | y18    | 2294.0              | 2294.0                 | 0.0        |
| C        | b3     | 449.1               | 449.2                  | -0.1       | y17    | 2133.9              | 2134.0                 | -0.1       |
| S        | b4     | 536.1               | 536.2                  | -0.1       | y16    | 1973.9              | 1973.9                 | 0.0        |
| N        | b5     | 650.2               | 650.2                  | 0.0        | y15    | 1886.8              | 1886.9                 | -0.1       |
| S        | b6     | 737.2               | 737.3                  | -0.1       | y14    | 1772.8              | 1772.9                 | -0.1       |
| C        | b7     | 897.2               | 897.3                  | -0.1       | y13    | 1685.7              | 1685.8                 | -0.1       |
| V        | b8     | 996.3               | 996.4                  | -0.1       | y12    | 1525.7              | 1525.8                 | -0.1       |
| P        | b9     | n.d.                | 1093.3                 |            | y11    | 1426.6              | 1426.7                 | -0.1       |
| H        | b10    | 1230.4              | 1230.5                 | -0.1       | y10    | 1329.6              | 1329.7                 | -0.1       |
| Q        | b11    | 1358.4              | 1358.5                 | -0.1       | y9     | 1192.5              | 1192.6                 | -0.1       |
| W        | b12    | 1544.5              | 1544.6                 | -0.1       | y8     | 1064.5              | 1064.6                 | -0.1       |
| L        | b13    | 1657.6              | 1657.7                 | -0.1       | y7     | 878.4               | 878.5                  | -0.1       |
| R        | b14    | 1813.6              | 1813.8                 | -0.2       | y6     | 765.3               | 765.4                  | -0.1       |
| I        | b15    | n.d.                | 1926.9                 |            | y5     | 609.1               | 609.3                  | -0.2       |
| F        | b16    | 2073.8              | 2073.9                 | -0.1       | y4     | n.d.                | 496.2                  |            |
| V        | b17    | n.d.                | 2173.0                 |            | y3     | n.d.                | 349.2                  |            |
| C        | b18    | n.d.                | 2333.0                 |            | y2     | 250.1               | 250.1                  | 0.0        |
| A        | b19    | n.d.                | 2404.0                 |            | y1     | n.d.                | 90.1                   |            |

n.d. not detected

**Supplementary Table S3.** Comparison of measured and calculated mass to charge ratios of y- and b-ions of the chymotryptic fragments with a mass of 3048.9 Da and 878.4 Da.

precursor: 3048.9 Da

| Sequence | b-ions |                     |                        |            | y-ions |                     |                        |            |
|----------|--------|---------------------|------------------------|------------|--------|---------------------|------------------------|------------|
|          | b-ion  | measured mass in Da | theoretical mass in Da | difference | y-ion  | Measured mass in Da | Theoretical mass in Da | Difference |
| C        | b1     | 161.1               | 161.0                  | 0.1        | y26    | 3049.1              | 3049.2                 | -0.1       |
| T        | b2     | 262.1               | 262.1                  | 0.0        | y25    | 2889.2              | 2889.2                 | 0.0        |
| P        | b3     | 359.1               | 359.1                  | 0.0        | y24    | 2788.1              | 2788.1                 | 0.0        |
| S        | b4     | n.d.                | 446.1                  | 0.0        | y23    | 2691.1              | 2691.1                 | 0.0        |
| G        | b5     | 503.1               | 503.2                  | 0.1        | y22    | 2604.0              | 2604.1                 | -0.1       |
| T        | b6     | 604.2               | 604.2                  | 0.0        | y21    | 2547.0              | 2547.0                 | 0.0        |
| I        | b7     | 717.2               | 717.3                  | 0.1        | y20    | 2445.9              | 2446.0                 | -0.1       |
| C        | b8     | 877.2               | 877.3                  | 0.1        | y19    | 2332.8              | 2332.9                 | -0.1       |
| S        | b9     | 964.3               | 964.3                  | 0.0        | y18    | 2172.8              | 2172.9                 | -0.1       |
| P        | b10    | 1061.3              | 1061.4                 | 0.1        | y17    | 2085.8              | 2085.9                 | -0.1       |
| E        | b11    | 1190.4              | 1190.4                 | 0.0        | y16    | 1988.7              | 1988.8                 | -0.1       |
| A        | b12    | 1261.4              | 1261.5                 | 0.1        | y15    | 1859.7              | 1859.8                 | -0.1       |
| P        | b13    | 1358.5              | 1358.5                 | 0.0        | y14    | 1788.6              | 1788.7                 | -0.1       |
| E        | b14    | 1487.5              | 1487.6                 | 0.1        | y13    | 1691.6              | 1691.7                 | -0.1       |
| Q        | b15    | 1615.6              | 1615.6                 | 0.0        | y12    | 1562.5              | 1562.6                 | -0.1       |
| C        | b16    | 1775.6              | 1775.6                 | 0.0        | y11    | 1434.4              | 1434.6                 | -0.2       |
| C        | b17    | 1935.6              | 1935.6                 | 0.0        | y10    | 1274.4              | 1274.6                 | -0.2       |
| S        | b18    | 2022.8              | 2022.7                 | -0.1       | y9     | 1114.4              | 1114.6                 | -0.2       |
| N        | b19    | 2136.8              | 2136.7                 | -0.1       | y8     | 1027.4              | 1027.5                 | -0.1       |
| S        | b20    | 2223.8              | 2223.7                 | -0.1       | y7     | 913.3               | 913.5                  | -0.2       |
| C        | b21    | 2383.9              | 2383.7                 | -0.2       | y6     | 826.3               | 826.5                  | -0.2       |
| V        | b22    | 2482.9              | 2482.8                 | -0.1       | y5     | 666.3               | 666.5                  | -0.2       |
| P        | b23    | n.d.                | 2579.9                 | n.d.       | y4     | 567.2               | 567.4                  | -0.2       |
| H        | b24    | 2717                | 2716.9                 | -0.1       | y3     | 470.2               | 470.3                  | -0.1       |
| Q        | b25    | 2845.1              | 2845.0                 | -0.1       | y2     | 333.1               | 333.3                  | -0.2       |
| W        | b26    | 3030.5              | 3031.1                 | 0.6        | y1     | n.d.                | 205.1                  | n.d.       |

precursor: 878.4Da

| Sequence | b-ions |                     |                        |            | y-ions |                     |                        |            |
|----------|--------|---------------------|------------------------|------------|--------|---------------------|------------------------|------------|
|          | b-ion  | measured mass in Da | Theoretical mass in Da | difference | y-ion  | measured mass in Da | Theoretical mass in Da | difference |
| L        | b1     | n.d.                | 114.1                  | n.d.       | y7     | 878.5               | 878.5                  | 0.0        |
| R        | b2     | 270.2               | 270.2                  | 0.0        | y6     | 765.4               | 765.4                  | 0.0        |
| I        | b3     | 383.3               | 383.3                  | 0.0        | y5     | 609.3               | 609.3                  | 0.0        |
| F        | b4     | 530.4               | 530.4                  | 0.0        | y4     | 496.2               | 496.2                  | 0.0        |
| V        | b5     | 629.4               | 629.4                  | 0.0        | y3     | 349.2               | 349.1                  | 0.1        |
| C        | b6     | 789.5               | 789.4                  | 0.1        | y2     | 250.1               | 250.1                  | 0.0        |
| A        | b7     | n.d.                | 860.5                  | n.d.       | y1     | n.d.                | 90.1                   | n.d.       |

n.d. not detected

**Supplementary Table S4.** Comparison of measured and calculated mass to charge ratios of y- and b-ions of carbamidomethylated full length bevuTI-I with a molecular weight of 3907.9 Da.

| Sequence | b-ions |                     |                        |            | y-ions |                     |                        |            |
|----------|--------|---------------------|------------------------|------------|--------|---------------------|------------------------|------------|
|          | b-ion  | measured mass in Da | theoretical mass in Da | difference | y-ion  | Measured mass in Da | theoretical mass in Da | difference |
| C        | b1     | n.d.                | 161.1                  |            | y33    | 3908.0              | 3908.7                 | -0.7       |
| T        | b2     | 262.1               | 262.1                  | 0.0        | y32    | 3748.6              | 3748.6                 | 0.0        |
| P        | b3     | n.d.                | 359.2                  |            | y31    | 3647.6              | 3647.6                 | 0.0        |
| S        | b4     | n.d.                | 446.2                  |            | y30    | 3550.6              | 3550.5                 | 0.1        |
| G        | b5     | n.d.                | 503.2                  |            | y29    | 3463.6              | 3463.5                 | 0.1        |
| T        | b6     | 604.2               | 604.3                  | -0.1       | y28    | 3406.3              | 3406.5                 | -0.2       |
| I        | b7     | 717.3               | 717.3                  | 0.0        | y27    | 3305.5              | 3305.4                 | 0.1        |
| C        | b8     | n.d.                | 877.4                  |            | y26    | 3192.4              | 3192.4                 | 0.0        |
| S        | b9     | n.d.                | 964.4                  |            | y25    | 3032.4              | 3032.3                 | 0.1        |
| P        | b10    | n.d.                | 1061.5                 |            | y24    | 2945.3              | 2945.3                 | 0.0        |
| E        | b11    | n.d.                | 1190.5                 |            | y23    | 2848.2              | 2848.2                 | 0.0        |
| A        | b12    | n.d.                | 1261.5                 |            | y22    | 2719.3              | 2719.2                 | 0.1        |
| P        | b13    | n.d.                | 1358.6                 |            | y21    | 2648.2              | 2648.2                 | 0.0        |
| E        | b14    | n.d.                | 1487.6                 |            | y20    | 2551.2              | 2551.1                 | 0.1        |
| Q        | b15    | n.d.                | 1615.7                 |            | y19    | 2422.1              | 2422.1                 | 0.0        |
| C        | b16    | n.d.                | 1775.7                 |            | y18    | 2294.1              | 2294.0                 | 0.1        |
| C        | b17    | n.d.                | 1935.8                 |            | y17    | 2134.0              | 2134.0                 | 0.0        |
| S        | b18    | 2022.8              | 2022.8                 | 0.0        | y16    | 1974.0              | 1973.9                 | 0.1        |
| N        | b19    | n.d.                | 2136.8                 |            | y15    | 1887.0              | 1886.9                 | 0.1        |
| S        | b20    | 2223.1              | 2223.9                 | -0.8       | y14    | 1772.9              | 1772.9                 | 0.0        |
| C        | b21    | n.d.                | 2383.9                 |            | y13    | 1685.9              | 1685.8                 | 0.1        |
| V        | b22    | n.d.                | 2483.0                 |            | y12    | 1525.8              | 1525.8                 | 0.0        |
| P        | b23    | n.d.                | 2580.0                 |            | y11    | 1426.8              | 1426.7                 | 0.1        |
| H        | b24    | n.d.                | 2717.1                 |            | y10    | 1329.7              | 1329.7                 | 0.0        |
| Q        | b25    | 2845.1              | 2845.1                 | 0.0        | y9     | 1192.6              | 1192.6                 | 0.0        |
| W        | b26    | n.d.                | 3031.2                 |            | y8     | 1064.6              | 1064.6                 | 0.0        |
| L        | b27    | 3144.3              | 3144.3                 | 0.0        | y7     | 878.5               | 878.5                  | 0.0        |
| R        | b28    | 3300.4              | 3300.4                 | 0.0        | y6     | 765.4               | 765.4                  | 0.0        |
| I        | b29    | 3413.4              | 3413.5                 | -0.1       | y5     | 609.2               | 609.3                  | -0.1       |
| F        | b30    | 3560.6              | 3560.5                 | 0.1        | y4     | 496.2               | 496.2                  | 0.0        |
| V        | b31    | 3659.6              | 3659.6                 | 0.0        | y3     | 349.2               | 349.2                  | 0.0        |
| C        | b32    | 3819.7              | 3819.6                 | 0.1        | y2     | 250.1               | 250.1                  | 0.0        |
| A        | b33    | n.d.                | 3909.7                 |            | y1     | n.d.                | 90.1                   |            |

**Supplementary Table S5.** High sensitivity amino acid analysis<sup>#</sup> of bevuTI-I

| Amino acid                 | Amount (-H <sub>2</sub> O)*<br>(ng / sample) | pmoles / sample | moles (%)    | No. of residues |
|----------------------------|----------------------------------------------|-----------------|--------------|-----------------|
| Histidine                  | 262                                          | 1905            | 3.4          | 1               |
| Serine                     | 665                                          | 7633            | 13.7         | 4               |
| Arginine                   | 309                                          | 1975            | 3.5          | 1               |
| Glycine                    | 183                                          | 3207            | 5.8          | 1-2             |
| Aspartic acid <sup>§</sup> | 311                                          | 2698            | 4.8          | 1               |
| Glutamic acid <sup>§</sup> | 1120                                         | 8673            | 15.6         | 4               |
| Threonine                  | 401                                          | 3958            | 7.1          | 2               |
| Alanine                    | 316                                          | 4447            | 8.0          | 1-2             |
| Proline                    | 799                                          | 8225            | 14.8         | 4               |
| Lysine                     | 34                                           | 260             | 0.5          | 0               |
| Tyrosine                   | 50                                           | 305             | 0.5          | 0               |
| Valine                     | 405                                          | 4082            | 7.3          | 2               |
| Isoleucine                 | 435                                          | 3840            | 6.9          | 2               |
| Leucine                    | 263                                          | 2323            | 4.2          | 1               |
| Phenylalanine              | 325                                          | 2209            | 4.0          | 1               |
| <i>Total</i>               | <i>5874</i>                                  | <i>55741</i>    | <i>100.0</i> |                 |

<sup>#</sup>APAF sample ID: S0010203; methionine was not detected in this sample; limit of reporting was 20 ng/sample; cysteine and tryptophan are not analyzed by this method

\*Calculation based on amino acid residue mass in protein (molecular weight minus H<sub>2</sub>O).

<sup>§</sup>Asp/Asn and Glu/Gln cannot be distinguished by this method

**Supplementary Data S1 – S5: please see separate Excel file**

**Supplementary Data S1.** Number of identical hits with E-value  $\leq 10^{-4}$  identified with blastp query sequences specified in Table 1.

**Supplementary Data S2.** Overview of identified contigs found by blastp searches with query sequences listed in Table 1.

**Supplementary Data S3.** List of analyzed genomes (format: format assembly accession, version\_assembly) found in the GenBank folder of NCBI's FTP-server.

**Supplementary Data S4.** List of analyzed transcriptomes found in the TSA folder of NCBI's FTP-server.

**Supplementary Data S5.** List of analyzed *Viridiplantae* transcriptomes provided by the 1-kp project.
